# Supplementary material
Source: Springer Nature journal article supplement (https://www.springermedizin.de/resource/supplementary/13063_2014_2397_MOESM2_ESM.pdf/9622012)
Supplement: MOESM2 [file 9622012]

**Milestones**

Start evaluation / end evaluation

Development of instruments for collection of personal data (EI)

EI accomplished

App development accomplished

Amendment of study protocol for phase II

Recruiting

First patient in study

Last patient in study

**Phase**

I

II (prospective, multicenter, two-arm intervention study)

**Month**

2

4

6

8

10

12

14

16

18

20

22

24

26

28

30

32

34

36

**Plan**

Apr 14

Oct 14

Apr 15

Oct 15

Apr 16

Oct 16
